# Supplementary material for: Assessing the Ecotoxicity of Eight Widely Used Antibiotics on River Microbial Communities
Source: MDPI journal article supplement (doi:10.3390/ijms242316960), 2023-11-30
Supplement: s1 [file s1]

Table S1 Supplementary information

| PARAMETER        | UNITS                  | RESULT       |
|------------------|------------------------|--------------|
| Oxidability      | mg/L                   | 1.6          |
| Suspended solids | mg/L                   | < 4 ± 20%    |
| Dissolved solids | mg/L                   | 1600 ± 20%   |
| Calcium          | mg/L Ca                | 144 ± 10%    |
| Magnesium        | mg/L Mg                | 9.7 ± 15%    |
| Sodium           | mg/L Na                | 278 ± 16%    |
| Potassium        | mg/L K                 | 2.39 ± 15%   |
| Ammonium         | mg/L NH <sub>4</sub>   | 0.04         |
| Alkalinity       | mg/L CaCO <sub>3</sub> | 640 ± 15%    |
| Sulphates        | mg/L SO <sub>4</sub>   | 29.8 ± 10%   |
| Chlorides        | mg/L Cl                | 61.5 ± 10%   |
| Nitrates         | mg/L NO <sub>3</sub>   | < 2.29 ± 10% |
| Nitrites         | mg/L NO <sub>2</sub>   | 1.44 ± 20%   |
| Fluorides        | mg/L F                 | < 0.5 ± 14%  |
| Bromides         | mg/L Br                | < 0.20       |

Physicochemical analysis of the water samples (Gallego river, Zaragoza, Spain) from which the microbial communities under study were obtained.
